# Supplementary material
Source: publisher site journal article supplement (https://www.dovepress.com/article/504016)
Supplement: Supplementary file 1 [file get_supplementary_file.php]

| **Variable** | **Group 1** |
| --- | --- |
| **n** | 88 |
| **Gender, n (%)** |  |
| **Male** | 67（76.1） |
| **Female** | 21（23.9） |
| **Age (%)** |  |
| **<65** | 55（62.5） |
| **≥65** | 33（37.5） |
| **HBsAg (%)** |  |
| **Negative** | 32（36.4） |
| **Positive** | 56（63.6） |
| **HBV-DNA** |  |
| **≤20** | 73（83） |
| **>20** | 15（17） |
| **HCV-Ab** |  |
| **Negative** | 81（92） |
| **Positive** | 7（8） |
| **Tbil (%)** |  |
| **≤17.1** | 52（59.1） |
| **>17.1** | 36（40.9） |
| **ALB (%)** |  |
| **<35** | 82（93.2） |
| **≥35** | 6（6.8） |
| **ALBI (%)** |  |
| **I** | 62（70.5） |
| **II** | 26（29.5） |
| **Child-Pugh. grade** |  |
| **A** | 86（97.7） |
| **B** | 2（2.3） |
| **PT (s)** |  |
| **≤14** | 80（90.9） |
| **>14** | 8（9.1） |
| **AFP (%)** |  |
| **≤400** | 65（73.9） |
| **>400** | 23（26.1） |
| **Tumor differentiation** |  |
| **Low** | 15（17） |
| **High-median** | 73（83） |
| **Margin, n (%)** |  |
| **<0.5 cm** | 65（73.9） |
| **≥0.5 cm** | 23（26.1） |
| **Tumor number** |  |
| **1** | 73（83） |
| **2** | 11（12.5） |
| **3** | 2（2.3） |
| **4** | 2（2.2） |
| **Tumor number grade** |  |
| **1 (≤1)** | 73（83） |
| **2 (>1)** | 15（17） |
| **Tumor size (cm)** |  |
| **≤5** | 55（62.5） |
| **>5** | 33（37.5） |
| **CNLC** |  |
| **Ia** | 43（48.9） |
| **Ib** | 25（28.4） |
| **IIa** | 8（9.1） |
| **IIb** | 2（2.3） |
| **IIIa** | 10（11.4） |
| **BCLC** |  |
| **0** | 12（13.6） |
| **A** | 55（62.5） |
| **B** | 11（12.5） |
| **C** | 10（11.4） |
| **Satellite number** |  |
| **Absent** | 76（86.4） |
| **Present** | 12（13.6） |
| **Tumor embolus** |  |
| **Absent** | 78（88.6） |
| **Present** | 10（11.4） |
| **MVI** |  |
| **1** | 61（69.3） |
| **2** | 27（30.7） |
| **Cirrhosis (%)** |  |
| **Absent** | 8（9.1） |
| **Present** | 80（90.9） |

**Supplementary Table 1. Baseline Variables of Group 1.**

A
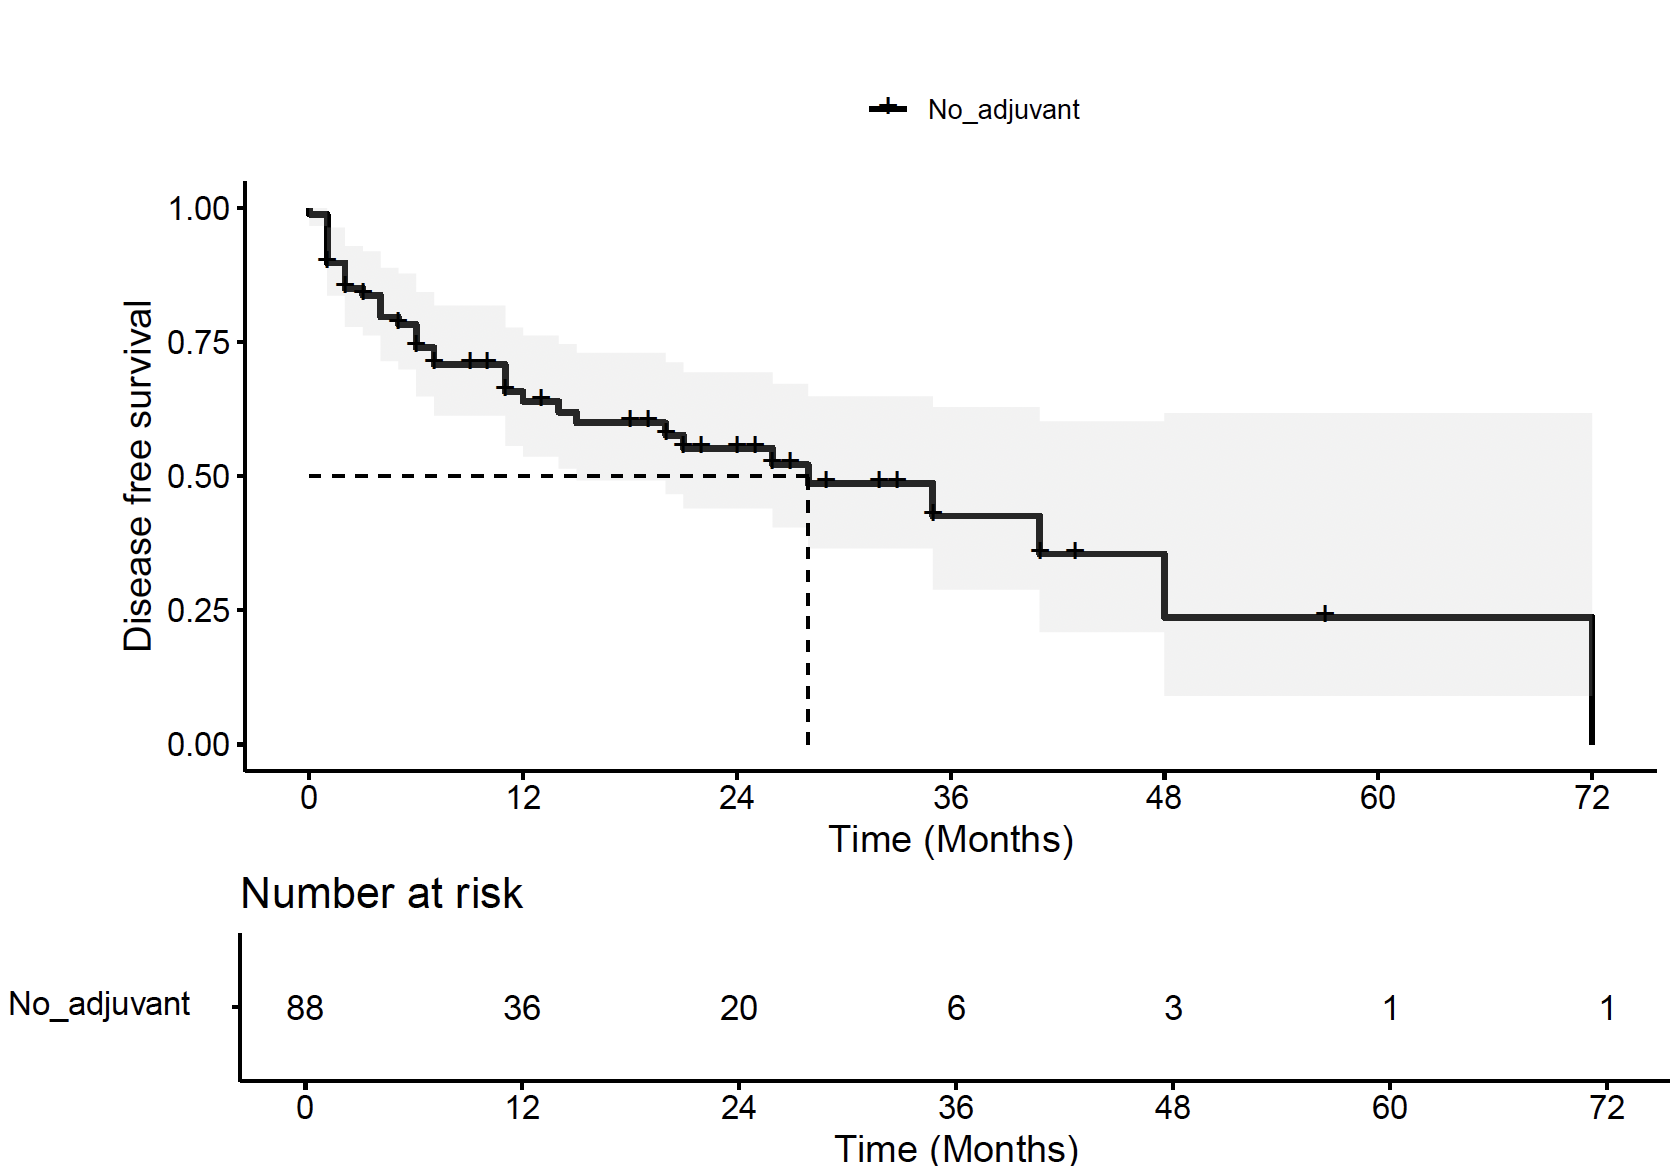


B


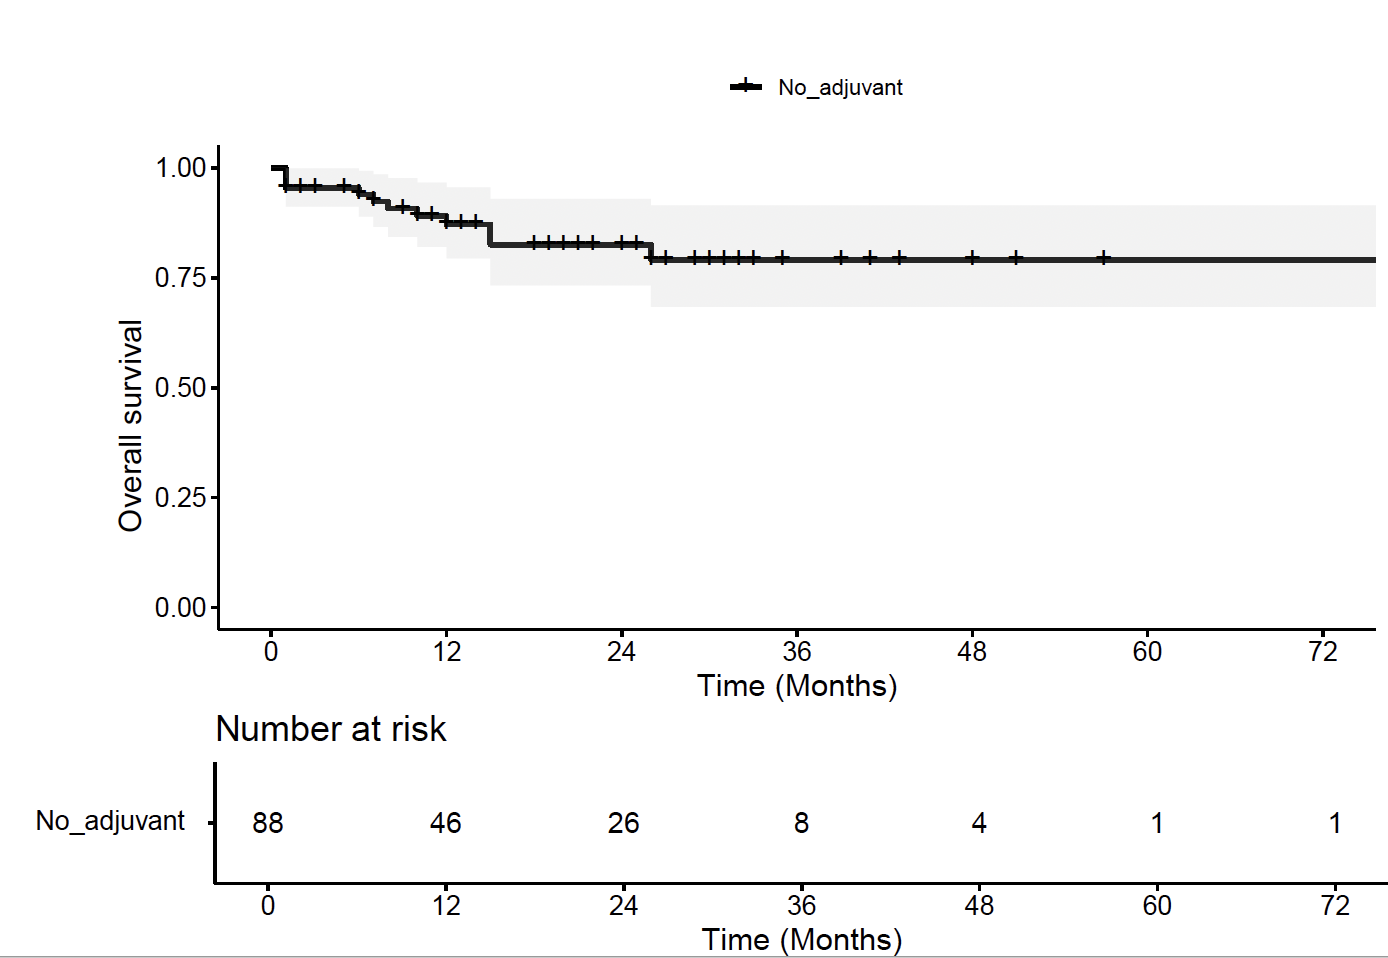


Supplementary Figure 1: Kaplan-Meier Survival Analysis for HCC Patients. This figure displays the DFS (A) and OS (B) of Group 1 HCC patients.
